# Supplementary material for: Evidence for a trap-and-flip mechanism in a proton-dependent lipid transporter
Source: PubMed Central journal article supplement (PMC8866510; doi:10.1038/s41467-022-28361-1), 2022-02-23
Supplement: 41467_2022_28361_MOESM1_ESM.pdf [file 41467_2022_28361_MOESM1_ESM.pdf]

Supplementary materials for

## **Evidence for a trap-and-flip mechanism in a proton-dependent lipid transporter**

Elisabeth Lambert, Ahmad Reza Mehdipour, Alexander Schmidt, Gerhard Hummer, Camilo Perez\*

\*Correspondence should be addressed to C.P. (email: [camilo.perez@unibas.ch](mailto:camilo.perez@unibas.ch))

**This PDF file includes:**

Figs. S1 to S8  
Tables S1 to S2

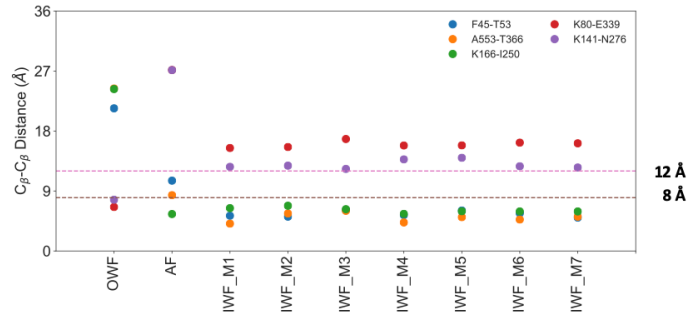

| Residues  | OWF  | AF   | IWF_M1 | IWF_M2 | IWF_M3 | IWF_M4 | IWF_M5 | IWF_M6 | IWF_M7 |
|-----------|------|------|--------|--------|--------|--------|--------|--------|--------|
| F45-T253  | 21.4 | 10.5 | 5.3    | 5.2    | 6.2    | 5.4    | 6.1    | 5.7    | 5.0    |
| A53-T366  | 24.4 | 8.4  | 4.1    | 5.7    | 6.1    | 4.3    | 5.1    | 4.8    | 5.2    |
| K166-I250 | 24.3 | 5.5  | 6.4    | 6.8    | 6.3    | 5.7    | 6.0    | 6.0    | 6.0    |
| K80-E339  | 6.7  | 27.1 | 15.5   | 15.6   | 16.8   | 15.8   | 15.8   | 16.2   | 16.1   |
| K141-N276 | 7.6  | 27.1 | 12.7   | 12.8   | 12.4   | 13.8   | 14.0   | 12.8   | 12.5   |

**Supplementary figure 1. Distances between residues selected for cross-linking in alternating conformations of LtaA.** C $\beta$ -C $\beta$  distances between residues selected for cysteine cross-linking in the outward-facing structure (OWF), in the best inward-facing models (IWF\_M), and in the AlphaFold (AF) inward-facing model. Distance thresholds considered for selection of residues pairs are shown.

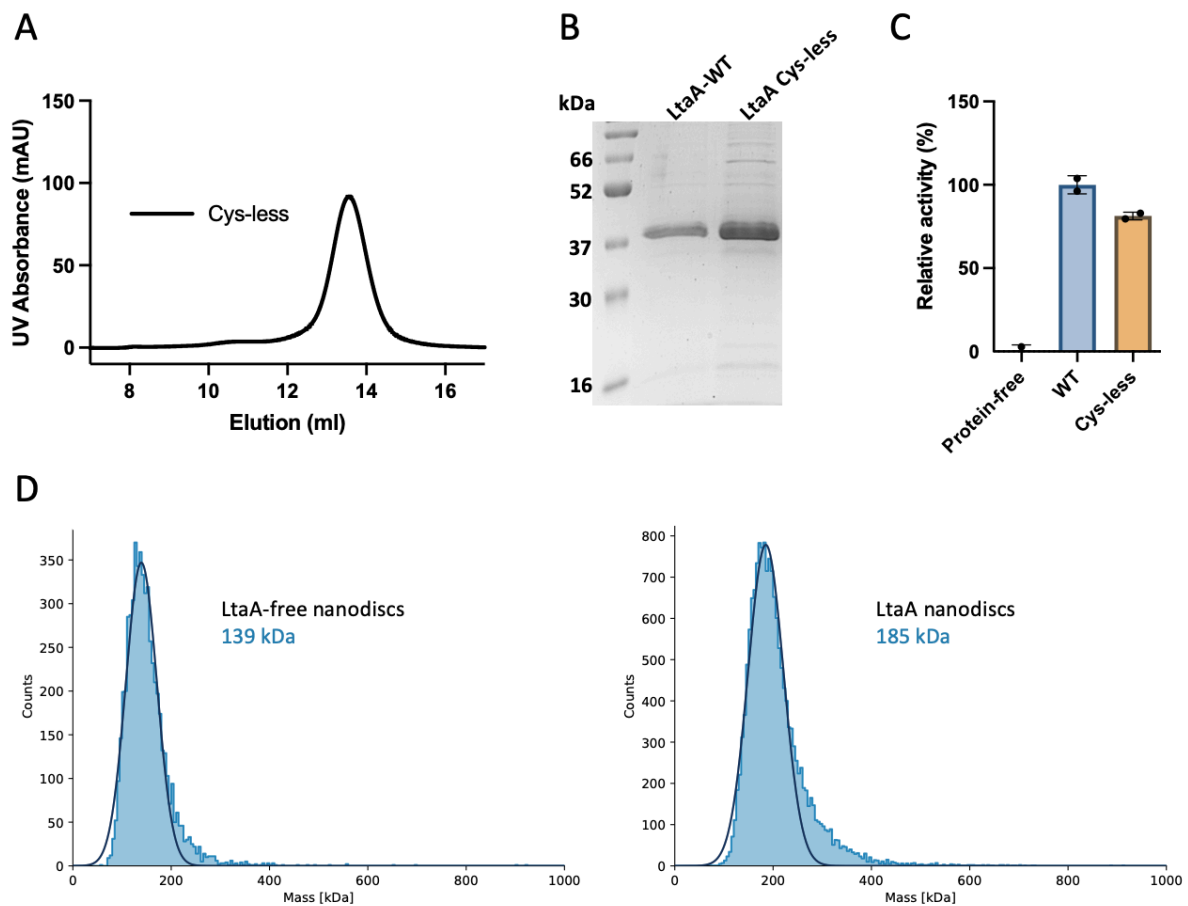

**Supplementary figure 2. Analysis of LtaA wild-type and cysteine-less variant.** **A.** Size Exclusion Chromatography profile of cysteine-less LtaA in a Superdex 200 Increase 10/300 GL column. **B.** SDS-PAGE of purified LtaA-WT and LtaA Cys-less. **C.** Relative flipping activity of LtaA Cys-less and LtaA-WT. Error bars show +/- standard deviation (s.d.) of technical replicates, n=3. **D.** Mass photometry analysis of nanodiscs without LtaA (*left*) and LtaA-reconstituted nanodiscs (*right*). The approximate molecular mass averages from Gaussian distributions are shown. The resulting apparent molecular mass difference (LtaA mass) is 46 kDa.

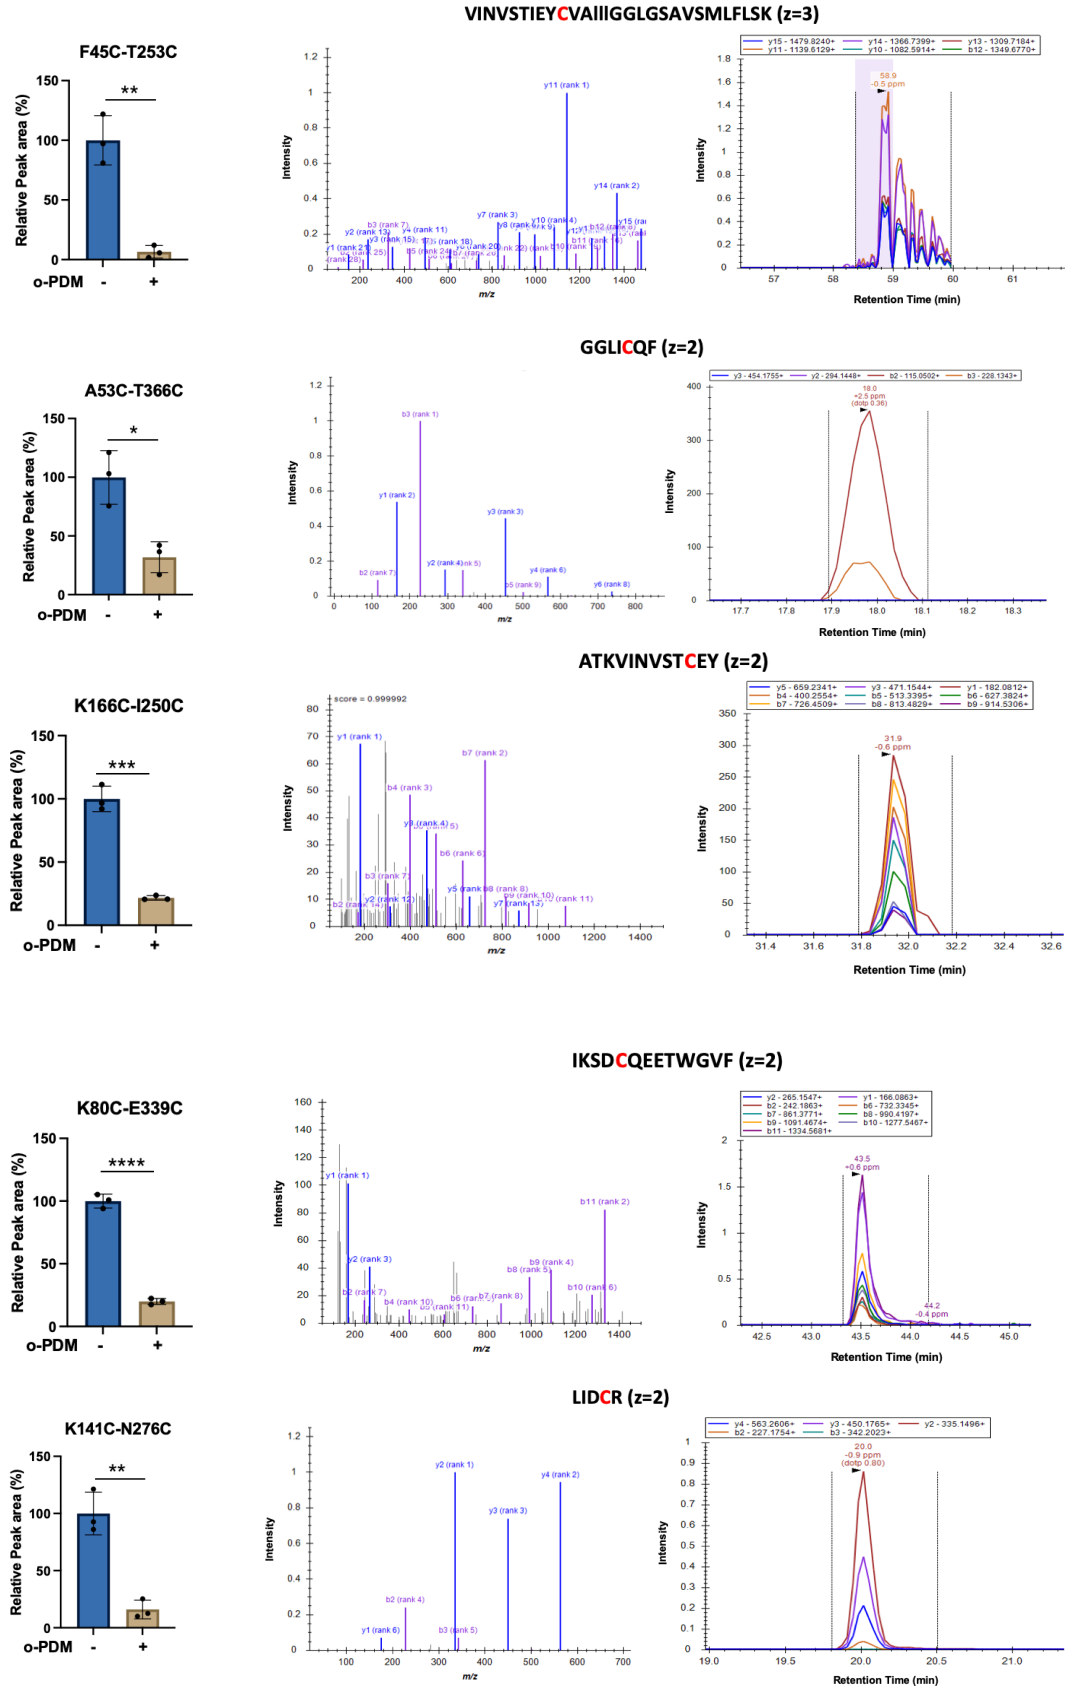

**Supplementary figure 3. LC-MS analysis of cysteine cross-linking showing that LtaA adopts inward- and outward-facing states. Selected pairs of residues for cross-linking are shown in Fig. 2. Left: Relative abundance of cysteine containing peptides in absence (-) or presence (+)**

of N,N'-(o-phenylene)-dimaleimide (o-PDM). Error bars indicate +/- s.d. (n=3, biological replicates). \*:  $P \leq 0.05$ , \*\*:  $P \leq 0.01$ , \*\*\*:  $P \leq 0.001$ , \*\*\*\*:  $P \leq 0.0001$ . Asterisks mark the result from unpaired t-test. *Center*: Assigned Collision-Induced Dissociation (CID) spectra obtained from cysteine containing peptides in absence of o-PDM. The position of the alkylated cysteine is indicated in red and the charge state (z) of the identified peptide ion is provided. *Right*: Elution profiles of the peptide fragments (transitions) identified used for peptide quantification by targeted LC-MS analysis. Source data are provided as a Source Data file.

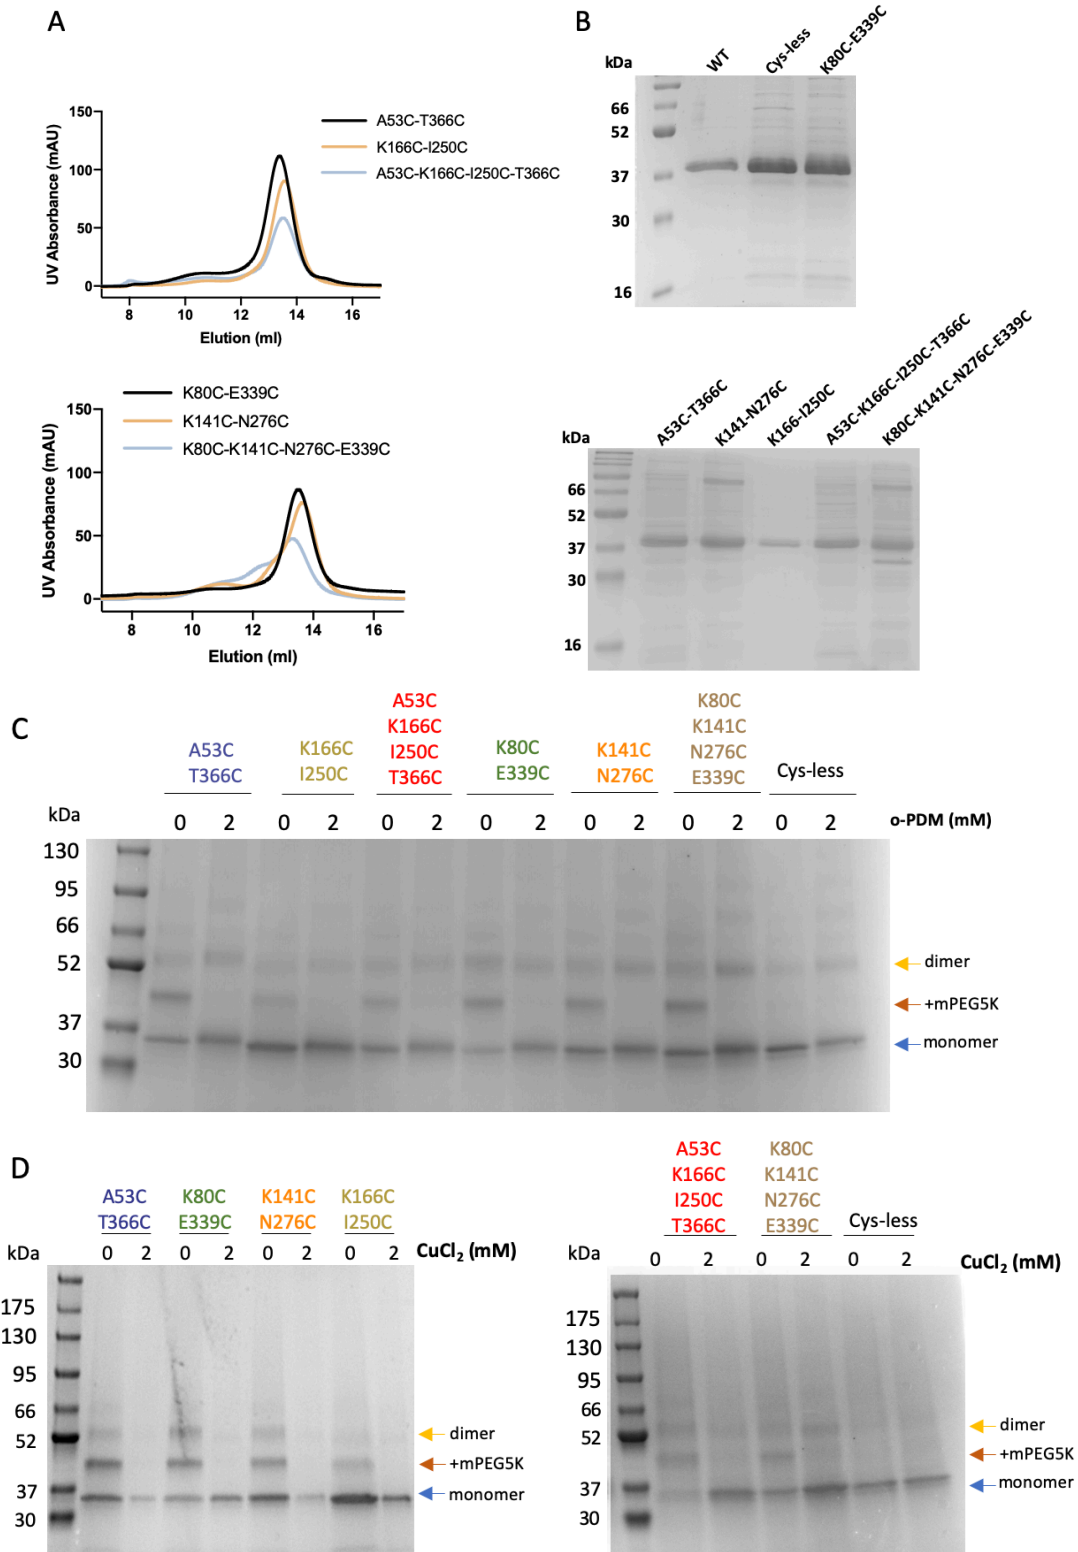

**Supplementary figure 4. Purifications and cross-linking in-gel analysis of LtaA variants.** **A.** Size Exclusion Chromatography profile of LtaA variants in a Superdex 200 Increase 10/300 GL column. **B.** SDS-PAGE of purified LtaA WT and variants. **C** and **D.** SDS-PAGE showing band shifts of samples treated with mPEG5K after cross-link with o-PDM or CuCl<sub>2</sub>, respectively. SDS-PAGE experiments were independently repeated at least three times with similar results. Source data are provided as a Source Data file.

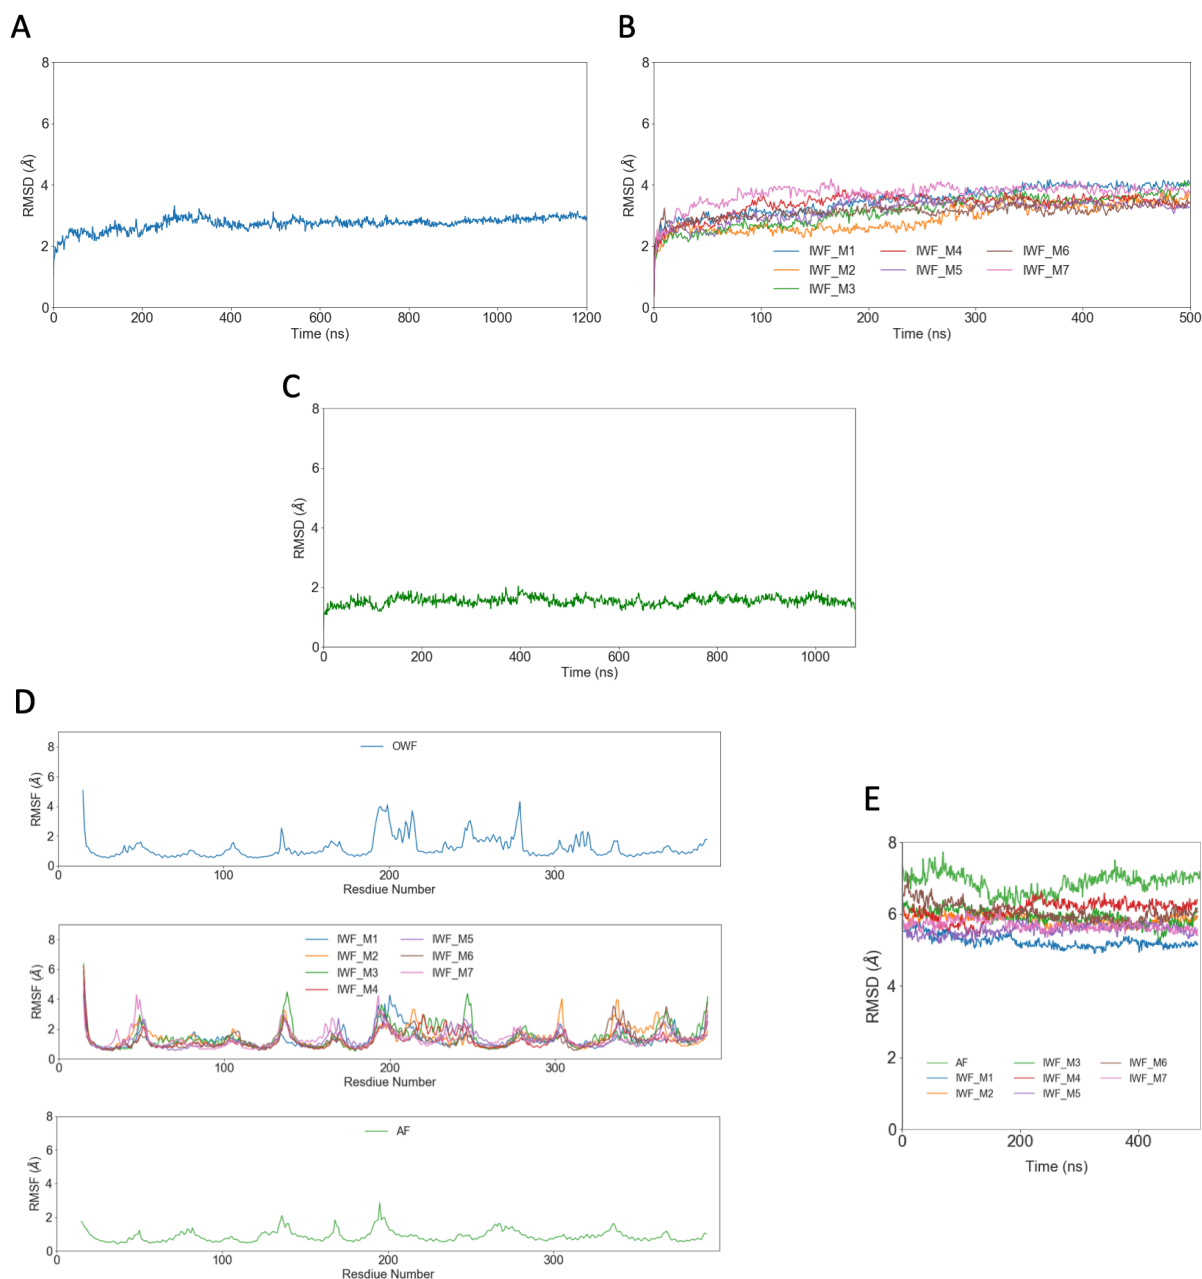

**Supplementary figure 5. Stability analysis from molecular dynamics simulations of LtaA in a membrane.** **A-C.** Root-mean-square-deviation (RMSD) plots of C $\alpha$  atoms relative to their starting points during MD simulations in a membrane composed of POG (65%), diacylglycerol (20%), cardiolipin (10%), and gentiobiosyl-diacylglycerol (5%). RMSD plots of C $\alpha$  atoms for outward-facing LtaA (**A**), inward-facing LtaA models obtained from the ‘repeat-swap’ approach (IWF\_M) (**B**), and the inward-facing LtaA model generated by AlphaFold (AF) (**C**) are shown. **D.** Root-mean-square-fluctuation (RMSF) plot of C $\alpha$  atoms for outward-facing (OWF) LtaA, ‘repeat-swap’ inward-facing LtaA models, and the inward-facing LtaA model generated by AlphaFold (AF), calculated for each MD simulation based on the average structure. **E.** RMSD plot of C $\alpha$  atoms of ‘repeat-swap’ inward-facing LtaA models and the AF inward-facing LtaA model during MD simulations relative to the outward-facing structure (PDB ID 6S7V).

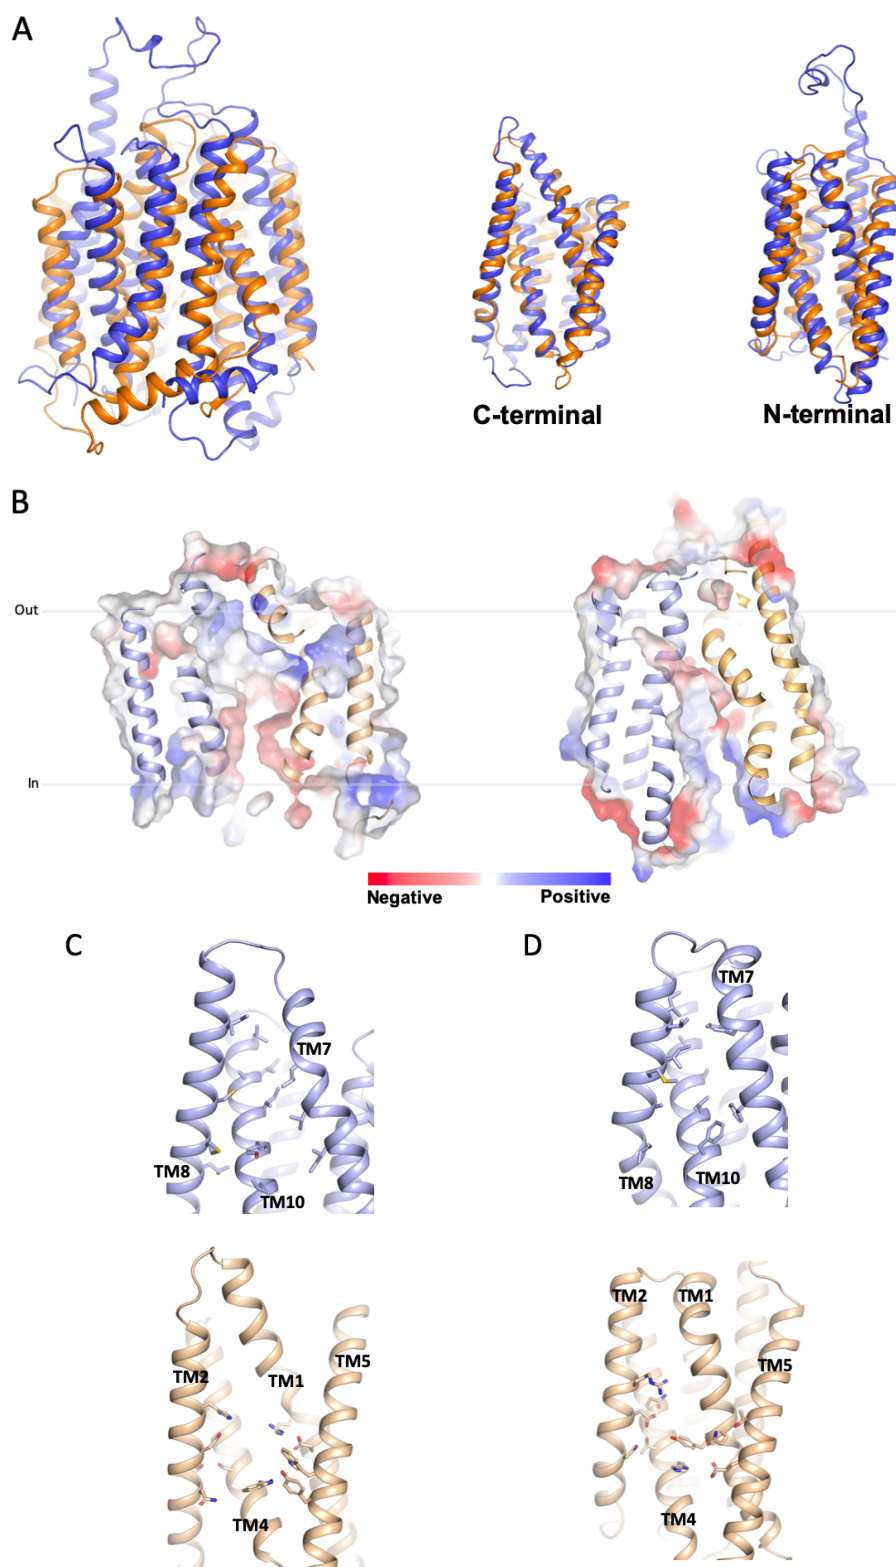

**Supplementary figure 6. Comparison of LtaA and MFSD2A fold and amphipathic cavity. A.** Superposition of LtaA (orange) and MFSD2A (blue) (r.m.s.d = 4.1Å), and individual N- and C-terminal domains (r.m.s.d= 2.6Å and 2.8Å, respectively). **B.** Vacuum electrostatic surface representation of inward-facing model of LtaA (*left*) and inward-facing MFSD2A (PDB ID 7MJS) (*right*). Residues participating in formation of N- and C-terminal hydrophilic and hydrophobic pockets in LtaA (**C**) and MFSD2A (**D**). N-terminal and C-terminal domains are shown in light orange and light blue, respectively.



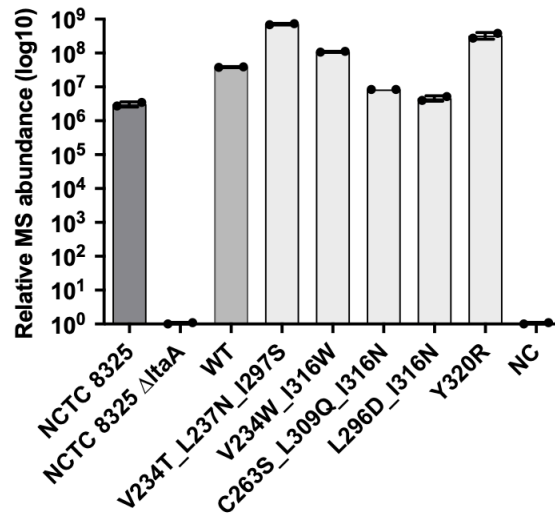

**Supplementary figure 7. LC-MS analysis of relative abundance of LtaA-WT and variants in *S. aureus* membranes.** The histogram shows relative abundances of LtaA WT and variants. Error bars show +/- s.d. of biological replicates (n=2).

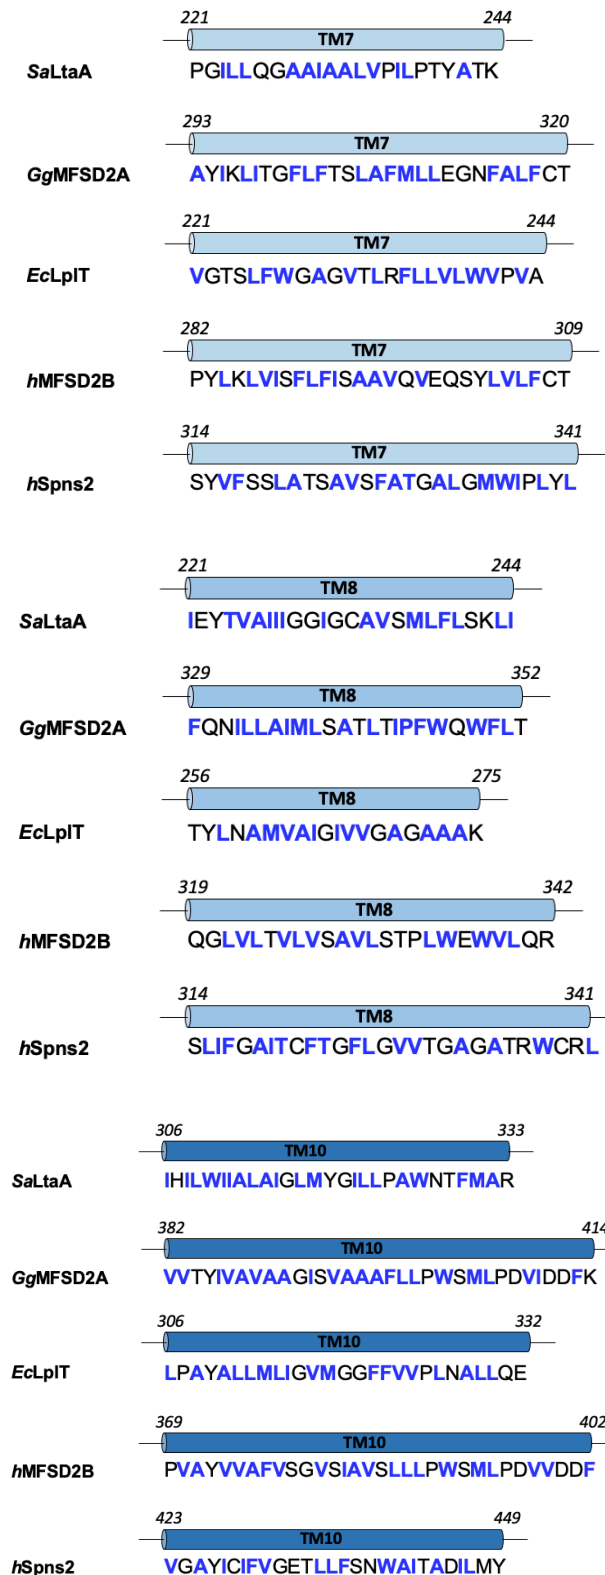

**Supplementary figure 8. C-terminal TM helices participating in formation of hydrophobic pockets in MFS lipid transporters.** Residues in TM7, 8, and 10 as seen in the structures of *S. aureus* LtaA (PDB ID 6S7V) and *Gallus gallus* MFSD2A (PDB ID 7MJS), and residues in predicted helical segments corresponding to the same TMs in *E. coli* LpIT, human MFSD2B, and human Spns2 are shown. Hydrophobic residues are shown in blue.

**Supplementary Table 1.** Validation parameters of the top seven inward-facing models.  
*Initial*: homology models from Modeler: *SCWRL*; the refined model by *SCWRL4*; *mini*: energy minimization of the model in a bilayer using Gromacs.

| Model | Clashscore |       |      | MolProbity score |       |      | Ramachandran favoured (%) |       |      | Ramachandran outliers (%) |       |      |
|-------|------------|-------|------|------------------|-------|------|---------------------------|-------|------|---------------------------|-------|------|
|       | Initial    | SCWRL | mini | Initial          | SCWRL | mini | Initial                   | SCWRL | mini | Initial                   | SCWRL | mini |
| 1     | 144.2      | 125.8 | 11.5 | 3.46             | 2.89  | 2.03 | 95.5                      | 95.2  | 93.4 | 0.8                       | 1.0   | 1.0  |
| 2     | 155.0      | 125.3 | 11.5 | 3.49             | 2.89  | 2.15 | 95.2                      | 95.2  | 92.9 | 0.8                       | 0.8   | 1.6  |
| 3     | 145.5      | 125.1 | 10.3 | 3.45             | 2.91  | 2.3  | 94.9                      | 94.9  | 92.2 | 1.1                       | 1.1   | 1.6  |
| 4     | 137.9      | 117.8 | 12.0 | 3.25             | 2.85  | 2.05 | 95.5                      | 95.5  | 92.9 | 0.5                       | 0.5   | 0.8  |
| 5     | 144.9      | 119.1 | 10.6 | 3.34             | 2.89  | 1.98 | 94.9                      | 95.0  | 93.4 | 0.8                       | 0.8   | 1.3  |
| 6     | 134.7      | 125.7 | 8.12 | 3.35             | 2.89  | 2.17 | 95.2                      | 95.2  | 93.6 | 1.1                       | 1.1   | 1.1  |
| 7     | 131.8      | 125.5 | 9.81 | 3.31             | 2.86  | 2.18 | 95.7                      | 95.7  | 92.3 | 1.1                       | 1.1   | 1.1  |

**Supplementary Table 2.** Oligo's used in this study. Mutagenesis is underlined

| Oligo name          | 5'-3' sequence                                                               |
|---------------------|------------------------------------------------------------------------------|
| Sa-Sall-FW          | GAGAGTCGACGGTCATTCATCACAACC                                                  |
| Sa-V234T-L237N-FW   | GGTGCCGCAATTGCTGCCCTAACCCCTATAAAATCCAACATATGCTACTAAGGTTAT                    |
| Sa-V234T-L237N-RV   | ATAACCTTAGTAGCATATGTTGGATTATAGGGGTTAGGGCAGCAATTGCGGCACC                      |
| Sa-V234W-FW         | GTGCCGCAATTGCTGCCCTATGGCCTATATTACCAACATATGCTAC                               |
| Sa-V234W-RV         | GTAGCATATGTTGGTAATATAGGCCATAGGGCAGCAATTGCGGCACC                              |
| Sa-C263S-FW         | CATTATTGGTGGTATCGGCTCTGCAGTTTCGATGCTATTT                                     |
| Sa-C263S-RV         | AAATAGCATCGAACTGCAGAGCCGATACCACCAATAATG                                      |
| Sa-L296D-FW         | TCTAAGCGGATTTATTTTATACATGATAGATATTTTACTCTATCTATGATTGTTAATATTCACA             |
| Sa-L296D-RV         | TGTGAATATTAACAATCATAGATAGAGTAAAAATATCTATCATGTATAAAAATAAATCCGCTTAGA           |
| Sa-I297S-FW         | GATTTATTTTATACATGATATTAAGTTTTACTCTATCTATGATTGTTAATATTC                       |
| Sa-I297S-RV         | GAATATTAACAATCATAGATAGAGTAAAACTTAATATCATGTATAAAAATAAATC                      |
| Sa-L309Q-I316N-FW   | CTATGATTGTTAATATTCACATCCAATGGATTATCGCTTTAGCTAATGGTCTAATGTATGGCATCTT<br>ATTAC |
| Sa-L309Q-I316N-RV   | GTAATAAGATGCCATACATTAGACCATTAGCTAAAGCGATAATCCATTGGATGTGAATATTAACA<br>ATCATAG |
| Sa-I316N-FW         | CTTGTGGATTATCGCTTTAGCTAATGGTCTAATGTATGGCATCTTATTAC                           |
| Sa-I316N-RV         | GTAATAAGATGCCATACATTAGACCATTAGCTAAAGCGATAATCCACAAG                           |
| Sa-I316W-FW         | CTTGTGGATTATCGCTTTAGCTTGGGGTCTAATGTATGGCATCTTATTAC                           |
| Sa-I316W-RV         | GTAATAAGATGCCATACATTAGACCCAAGCTAAAGCGATAATCCACAAG                            |
| Sa-Y320R-FW         | TTAGCTATCGGTCTAATGCGTGGCATCTTATTACCAGCATG                                    |
| Sa-Y320R-RV         | CATGCTGGTAATAAGATGCCACGCATTAGACCGATAGCTAA                                    |
| LtaA-NotI-RV        | GAGAGCGGCCGCAATAGTATTGTTAATCGTAGTATGTTTGAATTAATAAGA                          |
| F45C-FW             | GAGCTACATTAAGTGTCTGCCACCG                                                    |
| F45C-RV             | CGGTGGCAGACAGTTAATGTAGCTC                                                    |
| A53C-FW             | CCGTGACATCGATTGTGTGCTATTACATC                                                |
| A53C-RV             | GATGTAATAGCGACACAAATCGATGTCACGG                                              |
| K80C-FW             | CGTTATCGGCTTCTTATTATGTAAGTTTGGAACTAAGATC                                     |
| K80C-RV             | GATCTTAGTTCCAACTTACATAATAAGAAGCCGATAACG                                      |
| K141C-FW            | GAGGATAAACCGGGCTGTCAAATGGGCTACGTG                                            |
| K141C-RV            | CACGTAGCCATTTGACAGCCGCTTATCCTC                                               |
| K166C-FW            | CTTTATGAATTTGCTGATCTGIGTTATCCTACTCGTTCCG                                     |
| K166C-RV            | CGAAGCGAGTAGGATGAACACAGATCAGCAAATTCATAAAG                                    |
| I250C-FW            | CAAAAGTCATTAATGTATCAACGTGTGAATATACCGTGGCTATTATC                              |
| I250C-RV            | GATAATAGCCACGGTATATTCAACGTTGATACATTAAATGACTTTTG                              |
| T253C-FW            | GTATCAACGATTGAATATTGTGTGGCTATTATCATCGGCGG                                    |
| T253C-RV            | CCGCCGATGATAATAGCCACACAATATTCAATCGTTGATAC                                    |
| C263S-FW            | CGGCCGATTGGATCGGCCGTTAGTATGTTG                                               |
| C263S-RV            | CAACATACTAACGGCCGATCCAATGCCGCCG                                              |
| N276C-FW            | CTTAGTAAGTTGATCGACTGCCGTTTCGCGTAACTTTATGTAC                                  |
| N276C-RV            | GTACATAAAGTTACGCGAACGGCAGTCGATCAACTTACTAAG                                   |
| E339C-FW            | GCTTCATCAAGAGCGACTGTCAAGAGGAGACCTGG                                          |
| E339C-RV            | CCAGGTCTCCTCTTGACAGTCGCTCTTGATGAAGC                                          |
| T366C-FW            | GTTTGGCGGATTGATTGCCAGTTCACCAAC                                               |
| T366C-RV            | GTTGGTGAAGTGGCAAATCAATCCGCCAAAC                                              |
| LtaA-V234T-L237N-FW | GATTGCGGCTTTGACTCCTATCAACCCTACGTATGCCACA                                     |
| LtaA-V234T-L237N-RV | TGTGGCATACGTAGGGTTGATAGGAGTCAAAGCCGCAATC                                     |

|               |                                              |
|---------------|----------------------------------------------|
| LtaA-V234W-FW | GATTGCGGCTTTGTGGCCTATCCTGCCTAC               |
| LtaA-V234W-RV | GTAGGCAGGATAGGCCACAAAGCCGCAATC               |
| LtaA-C263S-FW | GCGGCATTGGATCGGCCGTTAGTATG                   |
| LtaA-C263S-RV | CATACTAACGGCCGATCCAATGCCGC                   |
| LtaA-L296D-FW | GGTTTTATTCTGTATATGATTGATATCTTCACGTTGTCTATG   |
| LtaA-L296D-RV | CATAGACAACGTGAAGATATCAATCATATACAGAATAAAACC   |
| LtaA-I297S-FW | TTATTCTGTATATGATTCTTAGTTTCACGTTGTCTATGATTGTC |
| LtaA-I297S-RV | GACAATCATAGACAACGTGAAACTAAGAATCATATACAGAATAA |
| LtaA-L309Q-FW | GTCAACATCCATATCCAATGGATTATTGCCTTGG           |
| LtaA-L309Q-RV | CCAAGGCAATAATCCATTGGATATGGATGTTGAC           |
| LtaA-I316N-FW | TGCCTTGGCGAACGGCCTGATG                       |
| LtaA-I316N-RV | CATCAGGCCGTTCCGAAGGCA                        |
| LtaA-I316W-FW | ATTATTGCCTTGGCGTGGGGCCTGATGTAT               |
| LtaA-I316W-RV | ATACATCAGGCCCCACGCCAAGGCAATAAT               |
| LtaA-Y320R-FW | GATCGGCCTGATGCGTGGGATTCTGTTGCCA              |
| LtaA-Y320R-RV | GATCGGCCTGATGCGTGGGATTCTGTTGCCA              |

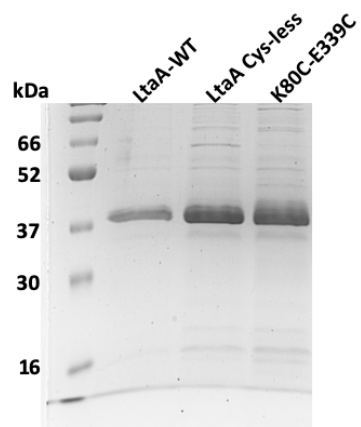

Suppl. Fig. 2B and 4B

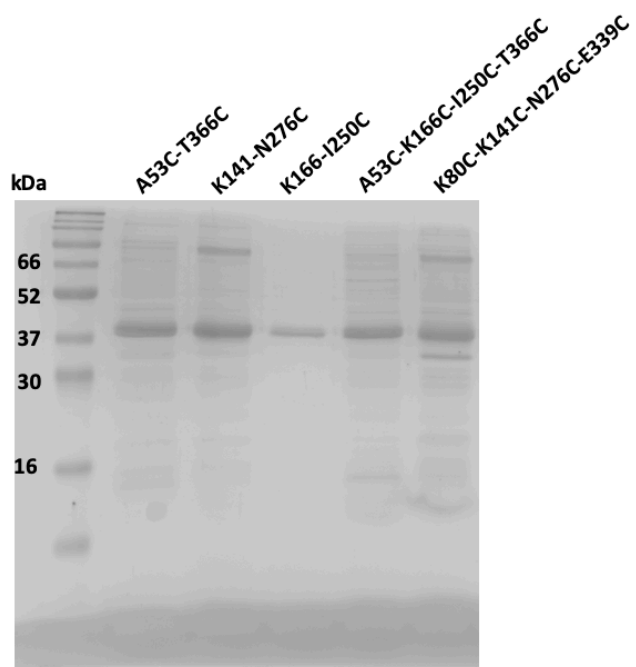

Suppl. Fig. 4B

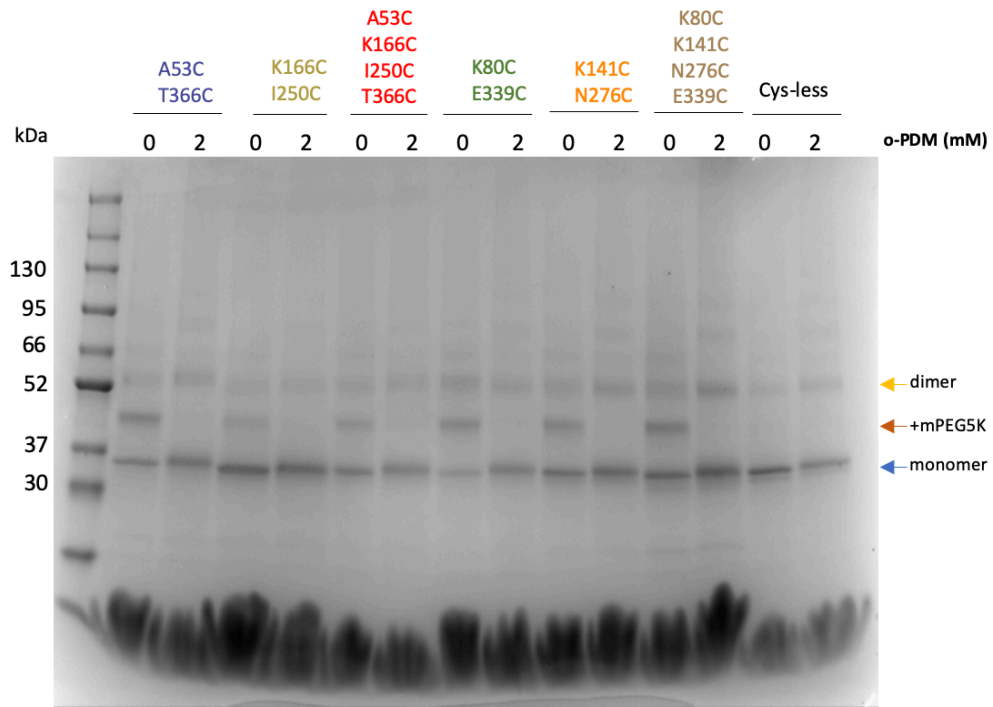

Fig. 2B and Suppl. Fig. 4C

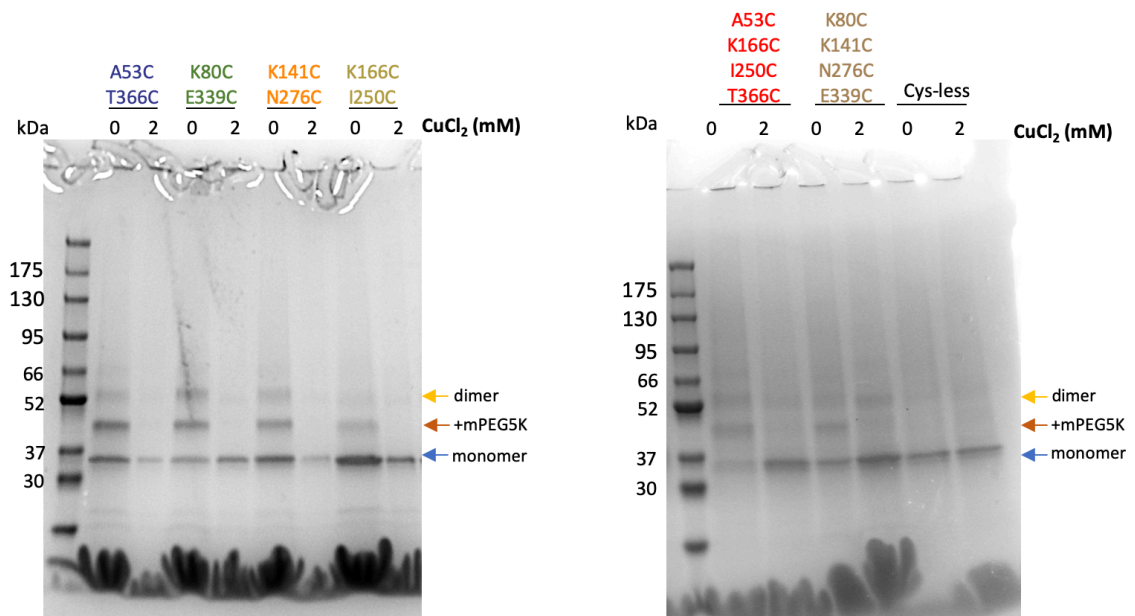

Fig. 4D and Suppl. Fig. 4D
