# Supplementary material for: Evidence for a trap-and-flip mechanism in a proton-dependent lipid transporter
Source: PubMed Central journal article supplement (PMC8866510; doi:10.1038/s41467-022-28361-1), 2022-02-23
Supplement: 41467_2022_28361_MOESM3_ESM.pdf [file 41467_2022_28361_MOESM3_ESM.pdf]

### **Description of Additional Supplementary Files**

File Name: Supplementary Movie 1

Description: Molecular dynamics simulations of outward-facing LtaA showing the intrusion of glycolipid and POPG molecules into the putative translocation pathway.

File Name: Supplementary Movie 2

Description: Molecular dynamics simulations of AF inward-facing LtaA showing the intrusion of glycolipid molecules into the putative translocation pathway.
